# Supplementary material
Source: PubMed Central journal article supplement (PMC3548047)
Supplement: NIHMS423046-supplement-1.pdf [file NIHMS423046-supplement-1.pdf]

**Guide to Supplementary Material:**

These pages contain Supplementary Figures 1-3.

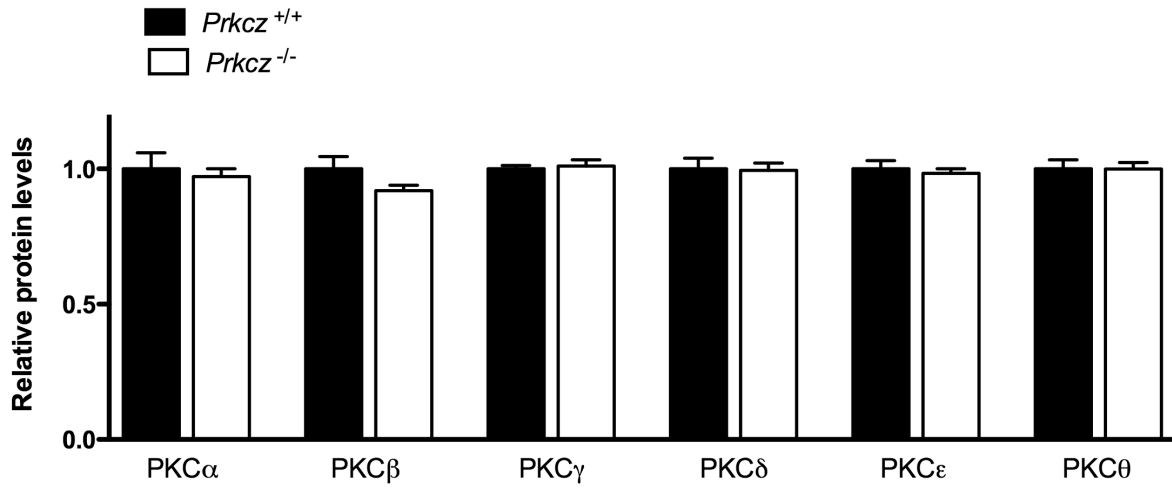

**Supplementary Fig. 1. PKC isozyme immunoreactivity in wild-type and *Prkcz*<sup>-/-</sup> mouse forebrain.** Results are expressed relative to the average of values in wild type samples;  $n=3$  wild-type,  $n=4$  *Prkcz*<sup>-/-</sup>. Data is shown as mean + s.e.m.

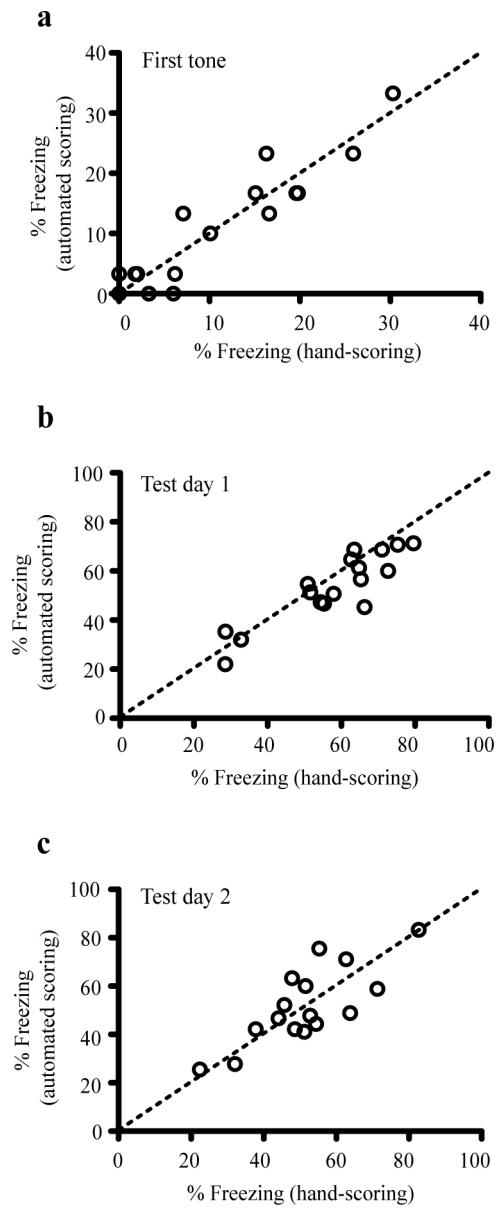

**Supplementary Fig. 2. Correlation of machine and hand scoring of freezing.** For cued fear conditioning, the Freeze Monitor automated scoring program correlated well with hand scoring on **a**, the training day and **b,c**, the test days. Each circle represents data from one mouse. The dashed line represents a hypothetical 100% correlation between automated and hand scoring.

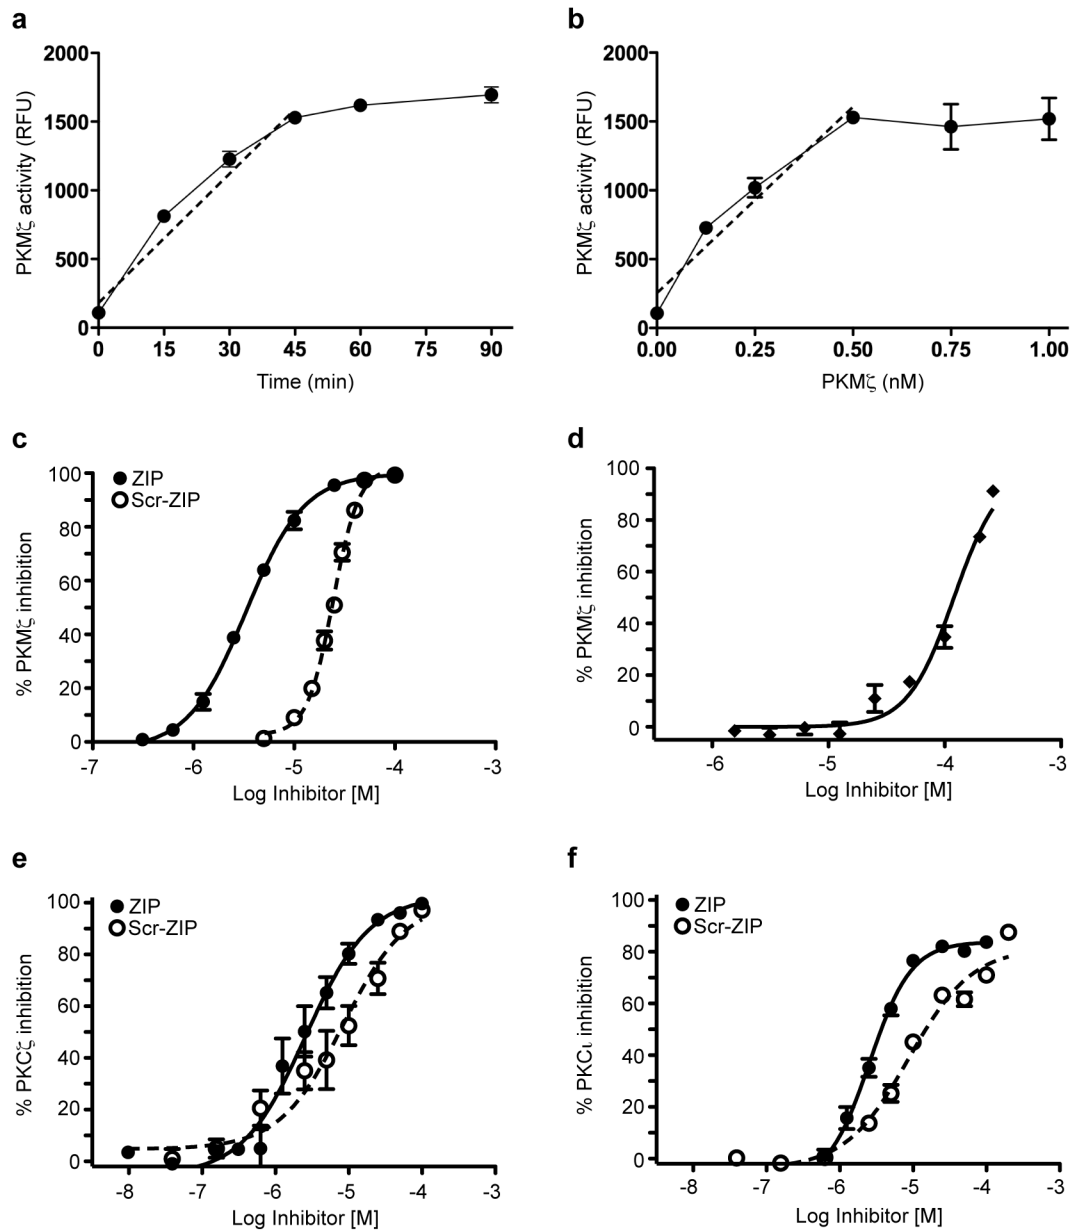

**Supplementary Fig. 3. Inhibition of atypical PKC isozymes by ZIP and chelerythrine.**

Kinase activity increased linearly with **a**, time up to 45 min of incubation and **b**, concentration up to 0.5 nM PKM $\zeta$ . **c**, ZIP and scrambled ZIP inhibited PKM $\zeta$  with  $\sim 7$ -fold difference in potency. **d**, Chelerythrine, assayed in the absence of DTT, inhibited PKM $\zeta$  only at concentrations  $\geq 30$   $\mu$ M. ZIP and scrambled ZIP also inhibited **e**, PKC $\zeta$  and **f**, PKC $\iota$  with similar potencies. Data shown are mean  $\pm$  s.e.m.;  $n=3$  for all groups.
